# Supplementary material for: Severe Periodontitis Is a Major Contributory Factor to Unmet Dental Healthcare Needs among Rheumatoid Arthritis Patients in Hong Kong
Source: Hindawi journal article supplement (doi:10.1155/2022/8710880), 2022-01-01

**Supplementary Table S1. Number of teeth in rheumatoid arthritis patients and age-matched community subjects.**

| Age subgroups | Number         | RA patients                 |                               |                  | Oral Health Survey 2011 |                      |                  |
|---------------|----------------|-----------------------------|-------------------------------|------------------|-------------------------|----------------------|------------------|
|               |                | Number of teeth             | Number (Percentage) >20 teeth | Total edentulous | Number of teeth         | Percentage >20 teeth | Total edentulous |
| All           | 238            | 24.8 ± 7.1<br>(range 0-32)  | 200 (85.0%)                   | 9 (3.8%)         |                         |                      |                  |
| 22-34 years   | 9<br>(3.8%)    | 30.2 ± 1.5<br>(range 28-32) | 9 (100%)                      | 0 (0%)           |                         |                      |                  |
| 35-44 years   | 15<br>(6.3%)   | 28.5 ± 3.0<br>(range 22-32) | 15 (100%)                     | 0 (0%)           | 28.6                    | 99.8%                | 0%               |
| 45-54 years   | 47<br>(19.7%)  | 28.2 ± 2.4<br>(range 21-32) | 47 (100%)                     | 0 (0%)           |                         |                      |                  |
| 55-64 years   | 88<br>(37.0%)  | 25.1 ± 6.7<br>(range 0-32)  | 78 (88.6%)                    | 4 (4.5%)         |                         |                      |                  |
| 65-74 years   | 69<br>(29.0%)  | 21.4 ± 7.9<br>(range 0-31)  | 50 (72.5%)                    | 3 (4.3%)         | 19.3                    | 59.5%                | 5.6%             |
| >74 years     | 10<br>(4.2%)   | 18.3 ± 11.8<br>(range 0-32) | 6 (60.0%)                     | 2 (20.0%)        |                         |                      |                  |
| Adult         | 159<br>(66.8%) | 26.7 ± 5.5<br>(range 0-32)  | 149 (93.7%)                   | 4 (2.5%)         |                         |                      |                  |
| Elderly       | 79<br>(33.2%)  | 21.0 ± 8.4<br>(range 0-32)  | 56 (70.9%)                    | 5 (6.3%)         |                         |                      |                  |

**Supplementary Table S2A. Dental outcomes of rheumatoid arthritis patients (n=238) and age-matched community subjects by adult and elderly categories.**

| Dental decay                                   | This project                                                          | Oral Health Survey 2011        |
|------------------------------------------------|-----------------------------------------------------------------------|--------------------------------|
|                                                | Number/Percentage of patients (Score)                                 | Percentage of subjects (Score) |
| <b>Decayed, Missing or Filled Teeth (DMFT)</b> |                                                                       |                                |
| All                                            | 235/238 (97.9%)<br>[score 12.8 ± 8.1 (median 11, IQR 10, range 0-32)] | -                              |
| Adult                                          | 154/159 (96.9%)<br>[score 10.3 ± 6.9 (median 9, IQR 8, range 0-32)]   | 96.1%<br>[score 6.9]           |
| Elderly                                        | 79/79 (100%)<br>[score 18.0 ± 7.8 (median 18, IQR 13, range 1-32)]    | 99.3%<br>[score 16.2]          |
| <b>Decayed teeth (DT)</b>                      |                                                                       |                                |
| All                                            | 81/238 (34.0%)<br>[score 0.8 ± 1.5 (median 0, IQR 1, range 0-12)]     | -                              |
| Adult                                          | 40/159 (25.2%)<br>[score 0.5 ± 1.0 (median 0, IQR 1, range 0-5)]      | 31.2%<br>[score 0.7]           |
| Elderly                                        | 41/79 (51.9%)<br>[score 1.4 ± 2.1 (median 1, IQR 2, range 0-12)]      | 47.8%<br>[score 1.3]           |
| <b>Missing teeth (MT)</b>                      |                                                                       |                                |
| All                                            | 226/238 (95.0%)<br>[score 7.2 ± 7.1 (median 5, IQR 5, range 0-32)]    | -                              |
| Adult                                          | 148/159 (93.1%)<br>[score 5.4 ± 5.5 (median 4, IQR 4, range 0-32)]    | 89.7%<br>[score 3.4]           |
| Elderly                                        | 78/79 (98.7%)<br>[score 11.0 ± 8.4 (median 9, IQR 9, range 0-32)]     | 98.1%<br>[score 12.7]          |
| <b>Filled teeth (FT)</b>                       |                                                                       |                                |
| All                                            | 199/238 (83.6%)<br>[score 4.9 ± 4.4 (median 4, IQR 6, range 0-22)]    | -                              |
| Adult                                          | 134/159 (84.3%)<br>[score 4.4 ± 4.0 (median 4, IQR 6, range 0-20)]    | 67.4%<br>[score 2.8]           |
| Elderly                                        | 65/79 (82.3%)<br>[score 5.8 ± 5.0 (median 6, IQR 6, range 0-22)]      | 59.5%<br>[score 2.3]           |
| <b>Edentulous</b>                              |                                                                       |                                |
| All                                            | 9/238 (3.8%)                                                          | -                              |
| Adult                                          | 4/159 (2.5%)                                                          | 0%                             |
| Elderly                                        | 5/79 (6.3%)                                                           | 5.6%                           |

**Supplementary Table S2B. Dental outcomes of rheumatoid arthritis patients (n=238) and age-matched community subjects by 10-year age groups.**

| Dental decay                                   | This project                                                            | Oral Health Survey 2011        |
|------------------------------------------------|-------------------------------------------------------------------------|--------------------------------|
|                                                | Number/Percentage of patients (Score)                                   | Percentage of subjects (Score) |
| <b>Decayed, Missing or Filled Teeth (DMFT)</b> |                                                                         |                                |
| All                                            | 235/238 (97.9%)<br>[score 13.0 ± 8.2 (median 11.0, IQR 11, range 0-32)] | -                              |
| 22-34 years                                    | 8/9 (88.9%)<br>[score 4.9 ± 3.0 (median 5, IQR 5, range 0-9)]           | -                              |
| 35-44 years                                    | 14/15 (93.3%)<br>[score 8.7 ± 5.0 (median 9.0, IQR 7, range 0-18)]      | 96.1%<br>[score 6.9]           |
| 45-54 years                                    | 44/47 (93.6%)<br>[score 8.1 ± 5.1 (median 7, IQR 8, range 0-32)]        | -                              |
| 55-64 years                                    | 88/88 (100%)<br>[score 12.3 ± 7.6, median 11, IQR 8, range 1-32]        | -                              |
| 65-74 years                                    | 69/69 (100%)<br>[score 18.1 ± 7.4 (median 17, IQR 13, range 1-32)]      | 99.3%<br>[score 16.2]          |
| >74 years                                      | 10/10 (100%)<br>[score 17.4 ± 10.8 (median 18, IQR 18, range 1-32)]     | -                              |
| <b>Decayed teeth (DT)</b>                      |                                                                         |                                |
| All                                            | 81/238 (34.0%)<br>[score 0.8 ± 1.5 (median 0, IQR 1, range 0-12)]       | -                              |
| 22-34 years                                    | 2/9 (22.2%)<br>[score 0.6 ± 1.1 (median 0, IQR 1, range 0-3)]           | -                              |
| 35-44 years                                    | 6/15 (40.0%)<br>[score 0.9 ± 1.2 (median 0, IQR 2, range 0-4)]          | 31.2%<br>[score 0.7]           |
| 45-54 years                                    | 12/47 (25.5%)<br>[score 0.4 ± 0.9 (median 0, IQR 1, range 0-5)]         | -                              |
| 55-64 years                                    | 20/88 (22.7%)<br>[score 0.5 ± 1.1, median 0, IQR 0, range 0-4]          | -                              |
| 65-74 years                                    | 37/69 (53.6%)<br>[score 1.6 ± 2.2 (median 1, IQR 3, range 0-12)]        | 47.8%<br>[score 1.3]           |
| >74 years                                      | 4/10 (40.0%)<br>[score 0.5 ± 0.7 (median 0, IQR 1, range 0-2)]          | -                              |
| <b>Missing teeth (MT)</b>                      |                                                                         |                                |
| All                                            | 226/238 (95.0%)<br>[score 7.4 ± 7.4 (median 5, IQR 6, range 0-32)]      | -                              |
| 22-34 years                                    | 7/9 (77.8%)<br>[score 1.8 ± 1.5 (median 1, IQR 3, range 0-4)]           | -                              |
| 35-44 years                                    | 12/15 (80.0%)<br>[score 3.5 ± 3.0 (median 3.0, IQR 4, range 0-10)]      | 89.7%<br>[score 3.4]           |
| 45-54 years                                    | 43/47 (91.5%)<br>[score 3.8 ± 2.4 (median 4, IQR 3, range 0-11)]        | -                              |
| 55-64 years                                    | 86/98 (97.8%)<br>[score 6.9 ± 6.7 (median 5, IQR 3, range 0-32)]        | -                              |
| 65-74 years                                    | 69/69 (100%)<br>[score 10.6 ± 8.0 (median 8, IQR 9, range 1-32)]        | 98.1%<br>[score 12.7]          |

|                          |                                                                       |                      |
|--------------------------|-----------------------------------------------------------------------|----------------------|
| >74 years                | 9/10 (90.0%)<br>[score 13.7 ± 11.8 (median 10.5, IQR 22, range 0-32)] | -                    |
| <b>Filled teeth (FT)</b> |                                                                       |                      |
| All                      | 199/238 (83.6%)<br>[score 4.8 ± 4.4 (median 4, IQR 6, range 0-22)]    | -                    |
| 22-34 years              | 8/9 (88.9%)<br>[score 2.6 ± 1.7 (median 2, IQR 3, range 0-5)]         | -                    |
| 35-44 years              | 12/15 (80.0%)<br>[score 4.3 ± 3.6 (median 4, IQR 5, range 0-12)]      | 67.4%<br>[score 2.8] |
| 45-54 years              | 36/47 (76.6%)<br>[score 3.9 ± 3.6 (median 4, IQR 6, range 0-13)]      | -                    |
| 55-64 years              | 78/88 (88.6%)<br>[score 4.9 ± 4.4 (median 4, IQR 6, range 0-20)]      | -                    |
| 65-74 years              | 58/69 (84.1%)<br>[score 6.2 ± 5.1 (median 6, IQR 7, range 0-22)]      | 59.5%<br>[score 2.3] |
| >74 years                | 7/10 (70.0%)<br>[score 3.2 ± 3.2 (median 2, IQR 7, range 0-7) ]       | -                    |
| <b>Edentulous</b>        |                                                                       |                      |
| All                      | 9/238 (3.8%)                                                          | -                    |
| 22-34 years              | 0/9 (0%)                                                              | -                    |
| 35-44 years              | 0/15 (0%)                                                             | 0%                   |
| 45-54 years              | 0/47 (0%)                                                             | -                    |
| 55-64 years              | 4/88 (4.5%)                                                           | -                    |
| 65-74 years              | 3/69 (4.3%)                                                           | 5.6%                 |
| >74 years                | 2/10 (20.0%)                                                          | -                    |

**Supplementary Table S3A. Periodontal outcomes of rheumatoid arthritis patients (n=238) and age-matched community subjects by adult and elderly categories.**

| Gum Disease                           | Number (Percentage) |                         |
|---------------------------------------|---------------------|-------------------------|
|                                       | RA patients         | Oral Health Survey 2011 |
| <b>Highest pocket depth</b>           |                     |                         |
| 0-3mm                                 |                     |                         |
| All                                   | 35/224 (15.6%)      | -                       |
| Adult                                 | 18/153 (11.8%)      | 60.4%                   |
| Elderly                               | 17/71 (23.9%)       | 40.8%                   |
| 4-5mm                                 |                     |                         |
| All                                   | 113/224 (50.4%)     | -                       |
| Adult                                 | 79/153 (51.6%)      | 29.8%                   |
| Elderly                               | 34/71 (47.9%)       | 38.8%                   |
| >6mm                                  |                     |                         |
| All                                   | 76/224 (33.9%)      | -                       |
| Adult                                 | 56/153 (36.6%)      | 9.8%                    |
| Elderly                               | 20/71 (28.2%)       | 20.4%                   |
| <b>Loss of attachment (LOA)</b>       |                     |                         |
| 0-3mm                                 |                     |                         |
| All                                   | 35/227 (15.4%)      | -                       |
| Adult                                 | 23/155 (14.8%)      | 48.2%                   |
| Elderly                               | 12/72 (16.7%)       | 9.5%                    |
| 4-5mm                                 |                     |                         |
| All                                   | 101/227 (44.5%)     | -                       |
| Adult                                 | 72/155 (46.5%)      | 40.5%                   |
| Elderly                               | 29/72 (40.3%)       | 43.2%                   |
| 6-8mm                                 |                     |                         |
| All                                   | 73/227 (32.2%)      | -                       |
| Adult                                 | 48/155 (31.0%)      | 8.4%                    |
| Elderly                               | 25/72 (34.7%)       | 30.6%                   |
| 9-11mm                                |                     |                         |
| All                                   | 17/227 (7.5%)       | -                       |
| Adult                                 | 11/155 (7.1%)       | 1.7%                    |
| Elderly                               | 6/72 (8.3%)         | 11.4%                   |
| ≥12mm                                 |                     |                         |
| All                                   | 1/227 (0.4%)        | -                       |
| Adult                                 | 1/155 (0.6%)        | 1.2%                    |
| Elderly                               | 0/72 (0%)           | 5.4%                    |
| <b>Chronic periodontitis (CPI ≥4)</b> |                     |                         |
| <b>All</b>                            | 90/227 (39.6%)      |                         |
| Adult                                 | 64/155 (41.3%)      |                         |
| Elderly                               | 26/72 (36.1%)       |                         |

**Supplementary Table S3B. Periodontal outcomes of rheumatoid arthritis patients and age-matched community subjects by 10-year age groups.**

| Gum Disease                 | Number (Percentage) |                         |
|-----------------------------|---------------------|-------------------------|
|                             | RA patients         | Oral Health Survey 2011 |
| <b>Highest pocket depth</b> |                     |                         |
| 0-3mm                       |                     |                         |
| All                         | 38/224 (17.0%)      | -                       |
| 22-34 years                 | 1/9 (11.1%)         | -                       |
| 35-44 years                 | 1/15 (6.7%)         | 60.4%                   |
| 45-54 years                 | 5/47 (10.6%)        | -                       |
| 55-64 years                 | 13/82 (15.9%)       | -                       |
| 65-74 years                 | 16/63 (25.4%)       | 40.8%                   |
| >74 years                   | 2/8 (25.0%)         | -                       |
| 4-5mm                       |                     |                         |
| All                         | 109/224 (48.7%)     | -                       |
| 22-34 years                 | 6/9 (66.7%)         | -                       |
| 35-44 years                 | 8/15 (53.3%)        | 29.8%                   |
| 45-54 years                 | 24/47 (51.1%)       | -                       |
| 55-64 years                 | 39/82 (47.6%)       | -                       |
| 65-74 years                 | 28/63 (44.4%)       | 38.8%                   |
| >74 years                   | 4/8 (50.0%)         | -                       |
| >6mm                        |                     |                         |
| All                         | 77/224 (34.4%)      | -                       |
| 22-34 years                 | 2/9 (22.2%)         | -                       |
| 35-44 years                 | 6/15 (40.0%)        | 9.8%                    |
| 45-54 years                 | 18/47 (38.3%)       | -                       |
| 55-64 years                 | 30/82 (36.6%)       | -                       |
| 65-74 years                 | 19/63 (30.2%)       | 20.4%                   |
| >74 years                   | 2/8 (25.0%)         | -                       |
| <b>Loss of attachment</b>   |                     |                         |
| 0-3mm                       |                     |                         |
| All                         | 36/227 (15.9%)      | -                       |
| 22-34 years                 | 1/9 (11.1%)         | -                       |
| 35-44 years                 | 1/15 (6.7%)         | 48.2%                   |
| 45-54 years                 | 10/47 (21.3%)       | -                       |
| 55-64 years                 | 12/84 (14.3%)       | -                       |
| 65-74 years                 | 11/64 (17.2%)       | 9.5%                    |
| >74 years                   | 1/8 (12.5%)         | -                       |
| 4-5mm                       |                     |                         |
| All                         | 99/227 (43.6%)      | -                       |
| 22-34 years                 | 6/9 (66.7%)         | -                       |
| 35-44 years                 | 8/15 (53.3%)        | 40.5%                   |
| 45-54 years                 | 20/47 (42.6%)       | -                       |
| 55-64 years                 | 37/84 (44.0%)       | -                       |
| 65-74 years                 | 25/64 (39.1%)       | 43.2%                   |
| >74 years                   | 3/8 (37.5%)         | -                       |
| 6-8mm                       |                     |                         |
| All                         | 76/227 (33.5%)      | -                       |

|                                          |                       |       |
|------------------------------------------|-----------------------|-------|
| 22-34 years                              | 2/9 (22.2%)           | -     |
| 35-44 years                              | 6/15 (40.0%)          | 8.4%  |
| 45-54 years                              | 15/47 (31.9%)         | -     |
| 55-64 years                              | 27/84 (32.1%)         | -     |
| 65-74 years                              | 23/64 (35.9%)         | 30.6% |
| >74 years                                | 3/8 (37.5%)           | -     |
| 9-11mm                                   |                       |       |
| All                                      | 15/227 (6.6%)         | -     |
| 22-34 years                              | 0/9 (0%)              | -     |
| 35-44 years                              | 0/15 (0%)             | 1.7%  |
| 45-54 years                              | 2/47 (4.3%)           | -     |
| 55-64 years                              | 7/84 (8.3%)           | -     |
| 65-74 years                              | 5/64 (7.8%)           | 11.4% |
| >74 years                                | 1/8 (12.5%)           | -     |
| ≥12mm                                    |                       |       |
| All                                      | 1/227 (0.4%)          | -     |
| 22-34 years                              | 0/9 (0%)              | -     |
| 35-44 years                              | 0/15 (0%)             | 1.2%  |
| 45-54 years                              | 0/47 (0%)             | -     |
| 55-64 years                              | 1/84 (1.2%)           | -     |
| 65-74 years                              | 0/64 (0%)             | 5.4%  |
| >74 years                                | 0/8 (0%)              | -     |
| <b>Chronic periodontitis (CPI &gt;4)</b> |                       |       |
| <b>All</b>                               | <b>90/227 (39.6%)</b> |       |
| 22-34 years                              | 2/9 (22.2%)           |       |
| 35-44 years                              | 7/15 (46.7%)          |       |
| 45-54 years                              | 19/47 (40.4%)         |       |
| 55-64 years                              | 36/84 (42.9%)         |       |
| 65-74 years                              | 24/64 (37.9%)         |       |
| >74 years                                | 2/8 (25.0%)           |       |

**Supplementary Table S4. Utilisation of dental healthcare services by rheumatoid arthritis patients and community subjects.**

| <b>Dental checkup</b>                 | <b>Number (Percentage)</b> | <b>Oral Health Survey<br/>2011</b> |
|---------------------------------------|----------------------------|------------------------------------|
| Regular visit                         |                            |                                    |
| Every 6 months                        | 13/183 (7.1%)              | 27.5%                              |
| Every 1-2 years                       | 71/183 (38.8%)             | 15.2%                              |
| >2 years                              | 8/183 (4.4%)               | 13.6%                              |
| Visit only when dental symptoms arise | 81/183 (44.3%)             | 43.7%                              |
| Never visit a dentist                 | 10/183 (5.5%)              | 0%                                 |



**Supplementary Figure S1. Proportion of rheumatoid arthritis patients having positive DMFT (A), decayed teeth (B), missing teeth (C) and filled teeth (D) by age groups (line representation), and by adult and elderly categories (bar representation), in comparison with the age-matched community subjects in Oral Health Survey 2011.**

(A)

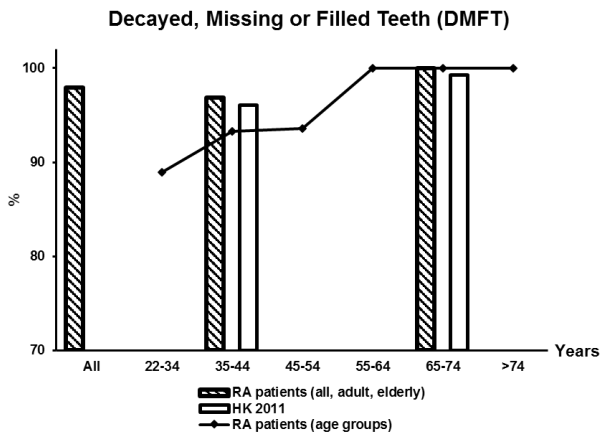

(B)

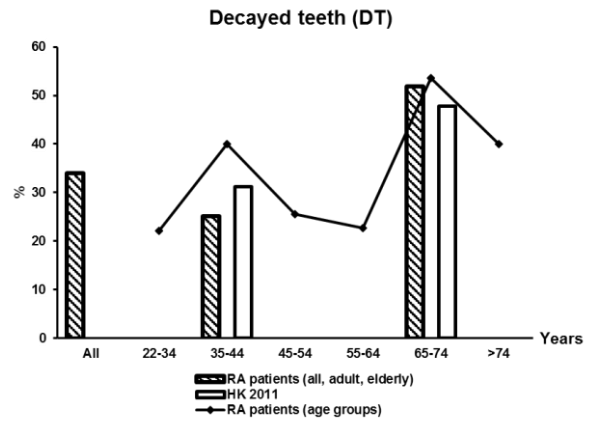

(C)

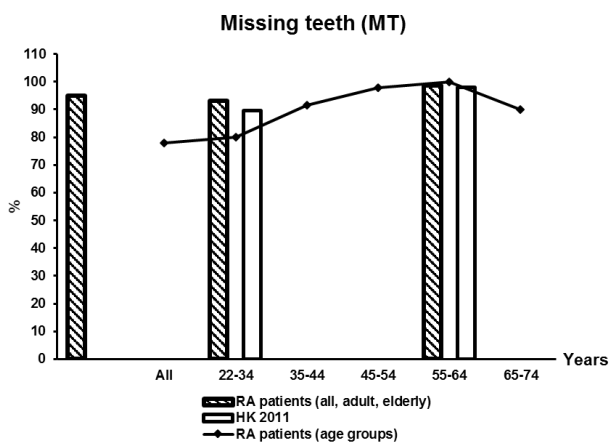

(D)

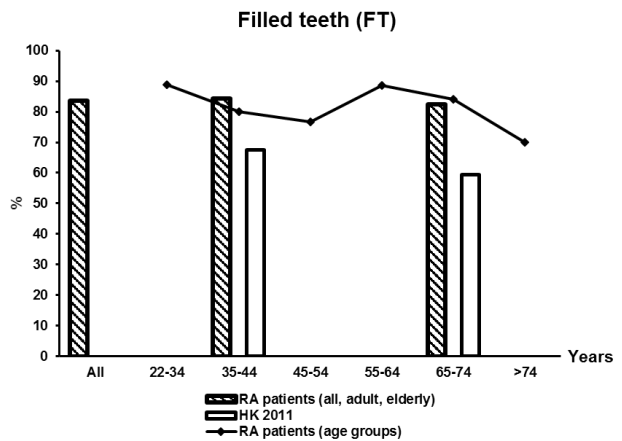

**Supplementary Figure S2. Highest pocket depth (A) and maximum loss of attachment (B) in rheumatoid arthritis patients by 10-year age groups in comparison with the age-matched community subjects in Oral Health Survey 2011.**

(A)

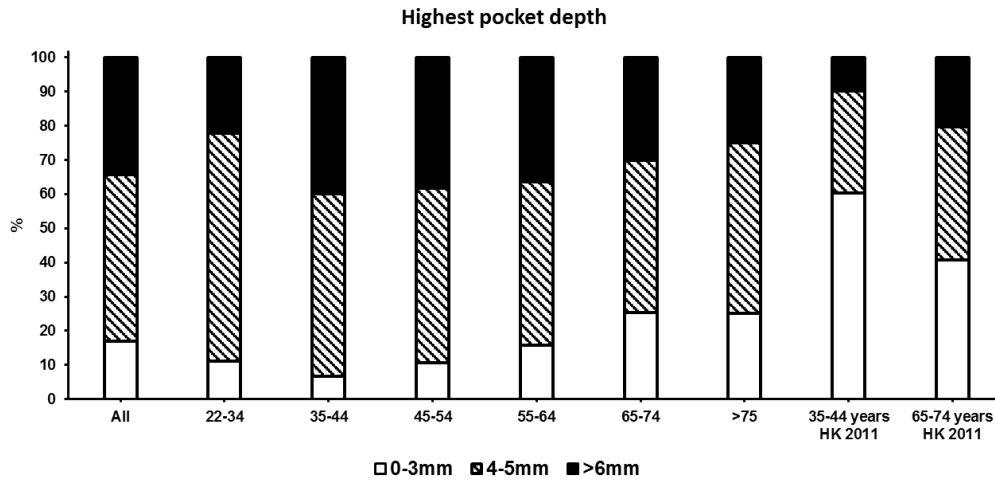

(B)

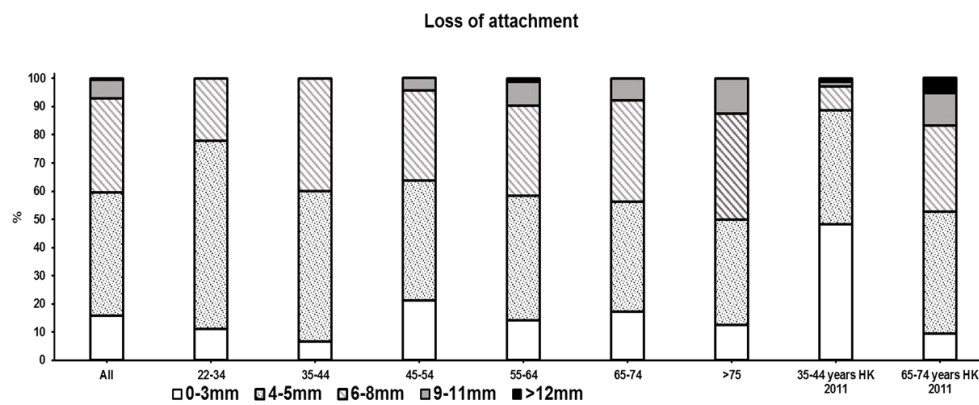

Supplement: f1 [file 8710880.f1.pdf]
